# Supplementary material for: Assessment of individual molecular response in chronic myeloid leukemia patients with atypical BCR-ABL1 fusion transcripts: recommendations by the EUTOS cooperative network
Source: PubMed Central journal article supplement (PMC8397658; doi:10.1007/s00432-021-03569-8), 2021-03-07
Supplement: 432_2021_3569_MOESM1_ESM.pdf [file 432_2021_3569_MOESM1_ESM.pdf]

Assessment of individual molecular response in chronic myeloid leukemia patients with atypical *BCR-ABL1* fusion transcripts. Recommendations by the EUTOS cooperative network.

Journal of Cancer Research and Clinical Oncology

Vivien Schäfer<sup>1</sup>, Helen E White<sup>2</sup>, Gareth Gerrard<sup>3</sup>, Susanne Möbius<sup>1</sup>, Susanne Saussele<sup>4</sup>, Georg Franke<sup>5</sup>, François-X. Mahon<sup>6</sup>, Rodica Talmaci<sup>7</sup>, Dolores Colomer<sup>8</sup>, Simona Soverini<sup>9</sup>, Katerina Machova Polakova<sup>10</sup>, Nicholas CP Cross<sup>2</sup>, Andreas Hochhaus<sup>1</sup>, Thomas Ernst<sup>1</sup>

Corresponding Author:

Prof. Dr. Thomas Ernst

Abteilung Hämatologie und Internistische Onkologie

Klinik für Innere Medizin II

Universitätsklinikum Jena

Am Klinikum 1, 07747 Jena, Germany

E-Mail: [thomas.ernst@med.uni-jena.de](mailto:thomas.ernst@med.uni-jena.de)

# Figure S1: pUC18\_BCR\_GUSB

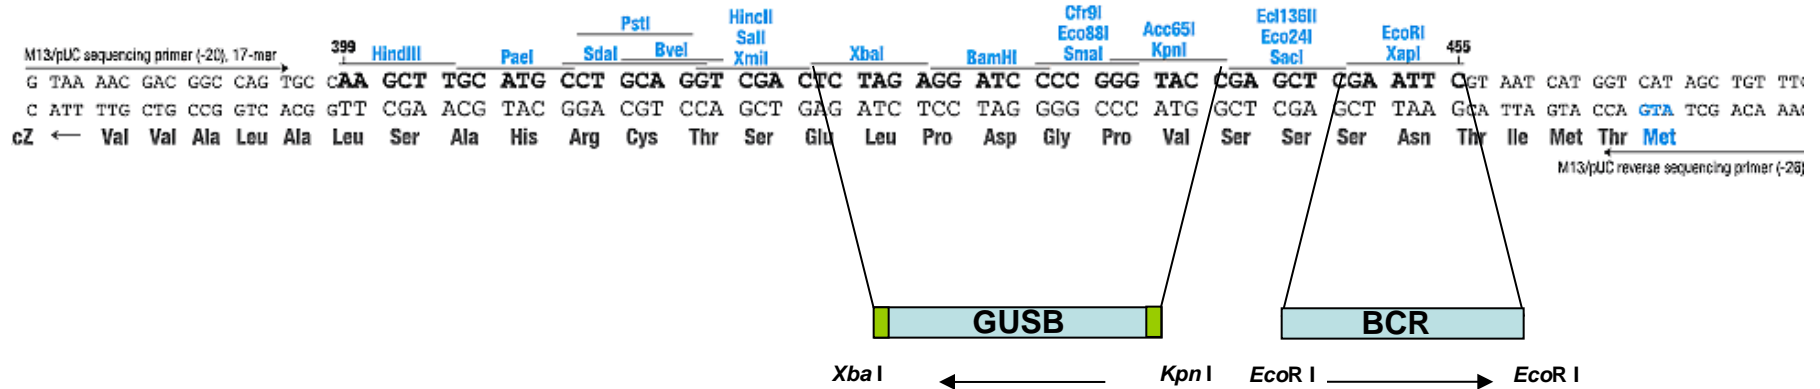

## Cloning site from pCR2.1

GUSB: cloned insert (813bp)

TTTCCGTACCAGCCACTACCCCTATGCAGAGGAAGTGATGCAGATGTGTGACCGCTATGGGATTGTGGTCAATCGATGAGTGTCCCGCGTGGGCCTGGCCTGCCGC  
 AGTTCTTCAACAACGTTTCTCTGCATCACCACATGCAGGTGATGGAAGAAGTGGTGCAGTAGGACCAAGAACCACCCCGCGTGTGATGTGGTCTGTGGCCAACGAG  
 CCTGCGTCCACCTAGAACTCTGCTGGCTACTACTTGAAGATGGTGTATCGCTCACACCAAATCCTTGGACCCCTCCCGGCCTGTGACCTTTGTGAGCAACTCTAACTA  
 TGCAGCAGACAAGGGGGCTCCGTATGTGGATGTGATCTGTTTGAACAGCTACTACTTGGTATCAGACTACGGGCACCTGGAGTTGATTCAGCTGCAGCTGGCCA  
 CCCAGTTTGAAGTGGTATAAGAAGTATCAGAAGCCATTATTCAGAGCGAGTATGGAGCAGAAACGATTGCAGGGTTTACCAGGATCCACCTCTGATGTTCACT  
 GAAGAGTACCAGAAAAGTCTGCTAGAGCAGTACCATCTGGGTCTGGATCAAAAACGAGAAAATATGTGGTGGAGAGCTCATTGGAAATTTTGGCGATTTCATGAC  
 TGAACAGTCCAGCAGAGAGTGTGGGAATAAAAAGGGATCTTCACTCGGCAGAGACAACCAAAAAGTGCAGCGTTCCCTTTTGCAGAGAGATACTGGAAAGTTG  
 CCAATGAAACCAGTATCCCACTCAGTAGCCAAGTCACAATGTTTGGAAAAACAGCCGTTTAC

BCR: cloned insert (963bp)

GTCCACTCAGCCACTGGATTTAAGCAGAGTTCAAATCTGTACTGCACCCTGGAGGTGGATTCTTTGGGTATTTTGTGAATAAAGCAAAGACGCGCTCTACAGGGA  
 CACAGCTGAGCCAAACTGGAAACGAGGAATTTGAGATAGAGCTGGAGGGCTCCAGACCCCTGAGGATACTGTGCTATGAAAAGTGTACACAAGACGAAGATCCCA  
 AGGAGGACGGCAGAGCACGGACAGACTCATGGGAAGGGCCAGTCCAGCTGGACCCGACGGCCCTGCAGGACAGAGACTGGCAGCGCACCGTCAATCGCCATGAAT  
 GGGATCGAAGTAAAGCTCTCGGTCAAGTTCAACAGCAGGGAGTTCAGCTTGAAGAGGATGCCGTCCCGAAAACAGACAGGGGTCTTCGGAGTCAAGATTGCTGTGGT  
 CACCAAGAGAGAGAGGTCCAAGGTGCCCTACATCGTGCAGTGCCTGGAGGAGATCGAGCGCCGAGGCATGGAGGAGGTGGGCATCTACCGCTGTCCGGTGTGG  
 CCAGGACATCCAGGCCTGAAGCAGCCTTCGACGTCAATAACAAGGATGTGTTCGGTGTGATGATGAGCGAGATGGACGTGAACGCCATCGCAGGCACCGTGAAGTGT  
 TACTTCCGTGAGCTGCCGAGCCCTCTTCACTGACGAGTTCACCCCAACTTCGAGAGGGCATCGCTCTTTCAGACCCGGTTGCAAAGGAGAGCTGCATGCTCAA  
 CCTGCTGCTGTCCCTGCCGAGGCCAACCCTGCTCACCTTCTTTTCTTCTGGACCACCTGAAAAGGGTGGCAGAGAAGGAGGCAGTCAATAAGATGTCCCTGCACA  
 ACCTCGCCACGGTCTTTGGCCCCACGCTGCTCCGGCCCTCCGAGAAGGAGAGCAAGTCCCTGCCAACCCAGCCAGCCTATCACCATGACTGACAGCTGGTCCCTTG

# Figure S2: pUC18\_BCR\_GUSB\_ABL1

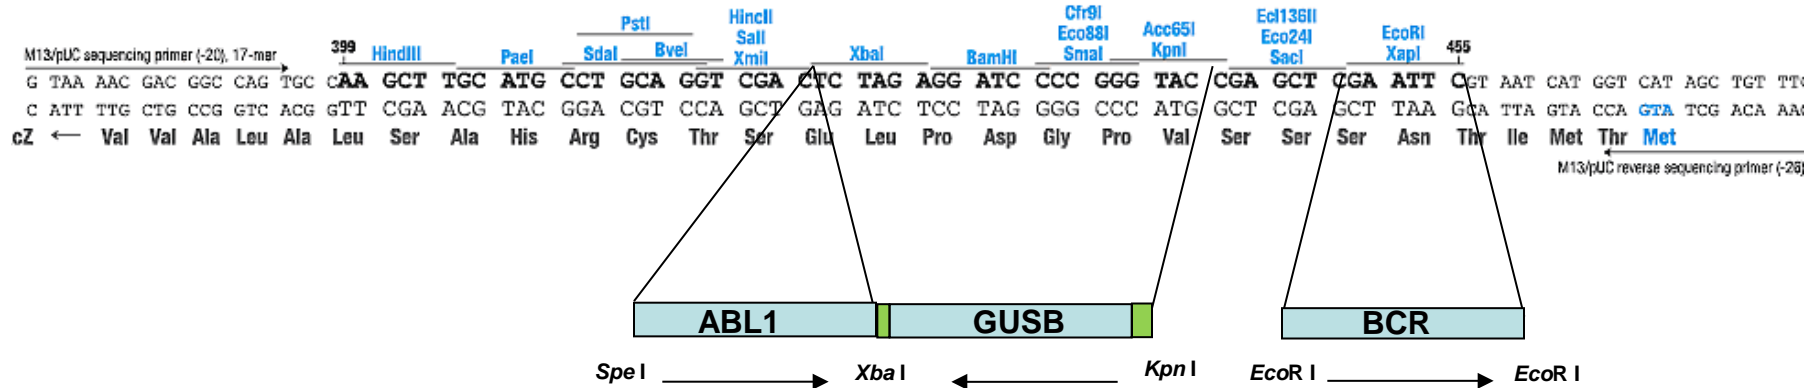

## Cloning site from pCR2.1

ABL: cloned insert (1803 bp)

CGTTGGAAC TCCAAGGAAAACCTTCTCGCTGGACCCAGTGAAAATGACCCCAACCTTTTCGTTGCACTGTATGATTTGTGGCCAGTGGAGATAA CACTCTAAGCAT  
 AACTAAAGGTGAAAAGCTCCGGGTCTTAGGCTATAATCACAATGGGGAATGGTGTGAAGCCCAAACCAAAAATGGCCAAGGCTGGGTCCCAAGCAACTACATCACGC  
 CAGTCAACAGTCTGGAGAAACACTCCTGGTACCATGGCCCTGTGTCCCGCAATGCCGCTGAGTATCTGTGTGAGCAGCGGGATCAATGGCAGCTTCTTGGTGC GTGAG  
 AGTGAGAGCAGTCTGGCCAGAGGTCCATCTCGCTGAGATA CGAAGGGAGGGTGTACCATTA CAGGATCAACACTGCTTCTGATGGCAAGCTCTACGCTCTCTCCGA  
 GAGCCGCTTCAACACCCCTGGCCGAGTTGGTTTCATCATATTCAACGGTGGCCGACGGGCTCATCACCACGCTCCATTATCCAGCCCAAAGCGCAACAAGCCACTG  
 TCTATGGTGTGTCCCCCAACTACGACAAGTGGGAGATGGAACGCACGGACATCACCATGAAGCACAAGCTGGGCGGGGGCCAGTACGGGGAGGTGTACGAGGGCGTG  
 TGGAAGAAATACAGCCTGACGGTGGCCGTGAAGACCTTGAAGGAGGACACCATGGAGGTGGAAGAGTTCTTGAAGAAGCTGCAGTCATGAAAGAGATCAAAACCC  
 TAACCTGGTGCAGCTCCTTGGGGTCTGCACCCGGGAGCCCCGTTCTATATCATCAGTTCATGACCTACGGGAACCTCCTGGACTACCTGAGGGAGTGCACCC  
 GGCAGGAGGTGAACGCCGTGGTGTCTGTACATGGCCACTCAGATCTCGTCAAGCATGGAGTACCTGGAGAAGAAAACTTTCATCCACAGAGATCTTGTGCCCCGA  
 AACTGCCTGGTAGGGGAGAACCCTTGGTGAAGGTAGCTGATTTGGCCCTGAGCAGTGTGATGACAGGGGACACCTACACAGCCCATGCTGGAGCCAAGTTCCCAT  
 CAAAATGGACTGCACCCGAGAGCCTGGCCCTACAACAAGTTCTCCATCAAGTCCGACGCTGGGCATTGGAGTATTGCTTTGGGAAATGCTACCTATGGCATGTCCC  
 CTTACCCGGGAATTGACCTGTCCAGGTGTATGAGCTGCTAGAGAAGGACTACCGCATGGAGCGCCAGAAAGGCTGCCAGAGAAGGTCTATGAACTCATGCGAGCA  
 TGTTGGCAGTGGAAATCCCTCTGACCCGGCCCTCCTTTGCTGAAATCCACCAAGCCTTTGAAACAATGTTCAGGAATCCAGTATCTCAGACGAAGTGGAAAGGAGCT  
 GGGGAAACAAGCGCTCCGTGGGGCTGTGAGTACCTTGTGTCAGGCCCCAGAGCTGCCACCAAGACGAGGACCTCCAGGAGAGCTGCAGAGCACAGAGACACCACTG  
 ACGTGCCTGAGATGCCTCACTCCAAGGGCCAGGGAGAGAGCATCTCTGGACCATGAGCCTGCCGCTGCTCCATTGCTCCCTCGAAAAGAGCGAGGTCCCCGGAG  
 GGCGCCCTGAATGAAGATGAGCGCCTTCTCCCAAGACAAAAAGACCAACTTGTTCAGCGCCTTGATCAAGAAGAAGAAGAAGACAGCCCCAACCCCTCCCAACG  
 CAGCAGCTCCTTCCGGGAGATGGACGGCCAGCCGGAGCGCAGAGGGCCGGCGAGGAAGAGGGCCGAGACATCAGCAACGGGGCACTGGCT

# Figure S3: pUC18\_BCR\_GUSB\_e6a2

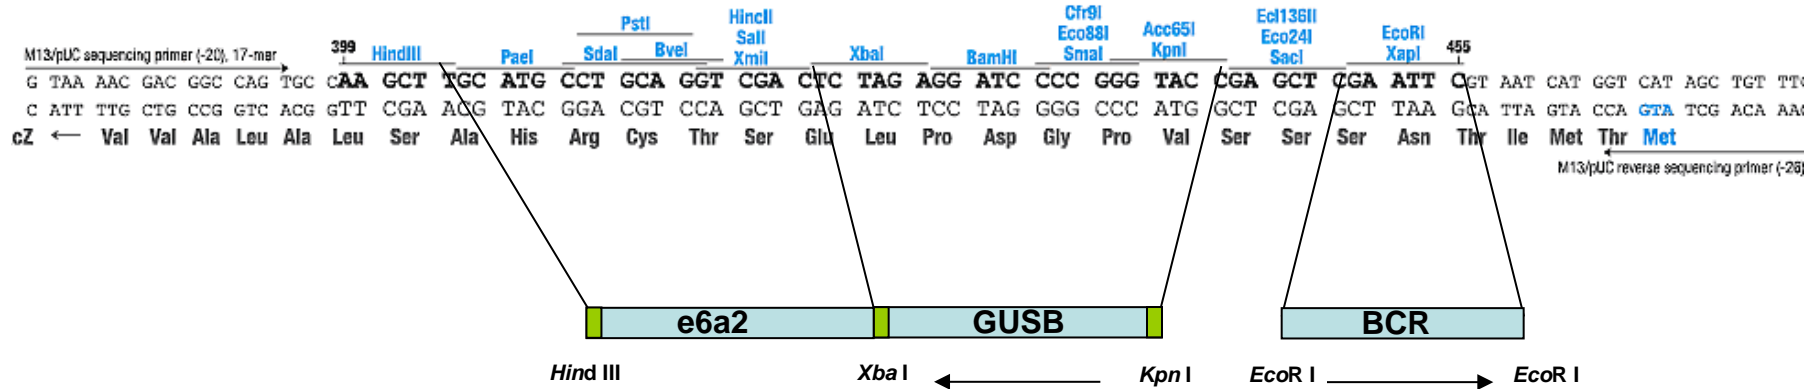

## Cloning site from pCR2.1

E6a2: cloned insert (1478bp)

CAAAGATGCCAAGGATCCAACGCCAAGAAGCTCTCTGAAAAAGCCCTTCAGCGGCCAGTAGCATCTGACTTTGAGCCTCAGGGTCTGAGTGAAGCCGCTCGTTGGA  
 ACTCCAAGGAAAACCTTCTCGCTGGACCCAGTGAAAAATGACCCCAACCTTTTCGTTGCACTGTATGATTTTGTGGCCAGTGGAGATAAACTCTAAGCATAACTAAA  
 GGTGAAAAGCTCCGGGTCTTAGGCTATAATCACAAATGGGAAATGGTGTGAAGCCCAAACCAAAAATGGCCAAGGCTGGGTCCCAAGCACTACATCACGCCAGTCAA  
 CAGTCTGGAGAAAACACTCCTGGTACCATGGGCCTGTGTCCCGCAATGCCGCTGAGTATCTGTCTGAGCAGCGGGATCAATGGCAGCTTCTTGGTGCCTGAGAGTGAGA  
 CGATCCTGGCCAGAGGTCCATCTCGCTGAGATACGAAGGGAGGGTGTACCATTACAGGATCAACTGCTTCTGATGGCAAGCTCTACGTCTCCTCCGAGAGCCGC  
 TTCAACACCCTGGCCGAGTTGGTTCATCATCATTC AACGGTGGCCGACGGGCTCATCACCACGCTCCATTATCCAGCCCCAAAGCGCAACAAGCCCACTGTCTATGG  
 TGTGTCCCCAACTACGACAAGTGGGAGATGGAAACGCACGGACATCACCATGAAGCACAAGCTGGGCGGGGCCAGTACGGGGAGGTGTACGAGGGCGTGTGGAAGA  
 AATACAGCCTGACGGTGGCCGTGAAGACCTTGAAGGAGGACACCATGGAGGTGGAAGAGTTCTTGAAGAAGCTGCAGTCAATGAAAGAGATCAAACACCCTAACCTG  
 GTGCAGCTCCTTGGGGTCTGCACCCGGGAGCCCCGTTCTATATCATCACTGAGTTCATGACCTACGGGAACCTCCTGGACTACCTGAGGGAGTGCAACCCGGCAGGA  
 GGTGAACGCCGTGGTGTCTGTACATGGCACTCAGATCTCGTCAGCCATGGAGTACCTGGAGAAGAAAACTTCCATCCACAGAGATCTTGTGCCCCGAACTGCC  
 TGGTAGGGGAGAACCCTTGGTGAAGGTAGCTGATTTTGGCCTGAGCAGGTTGATGACAGGGGACACTACAGCCCATGCTGGAGCCAAGTCCCCATCAAATGG  
 ACTGCACCCGAGAGCCTGGCCTACAACAAGTTCTCCAATCAAGTCCGACGCTCTGGGCATTTGGAGTATTGCTTTGGGAAATGCTACCTATGGCATGTCCCTTACCC  
 GGAATTGACCTGTCCAGGTGTATGAGCTGCTAGAGAAGGACTACCGCATGGAGGCCCCAGAAGGTGCCAGAGAAGGTCTATGAACTCATGCAGCATGTTGGC  
 AGTGAATCCCTCTGACCGGCCCTCCTTTGCTGAAATCCACCAAGCCTTTGAAACAATGTTCCAGGAATCCAGTATCTCAGACGAAG

# Figure S4: pUC18\_BCR\_GUSB\_e8a2

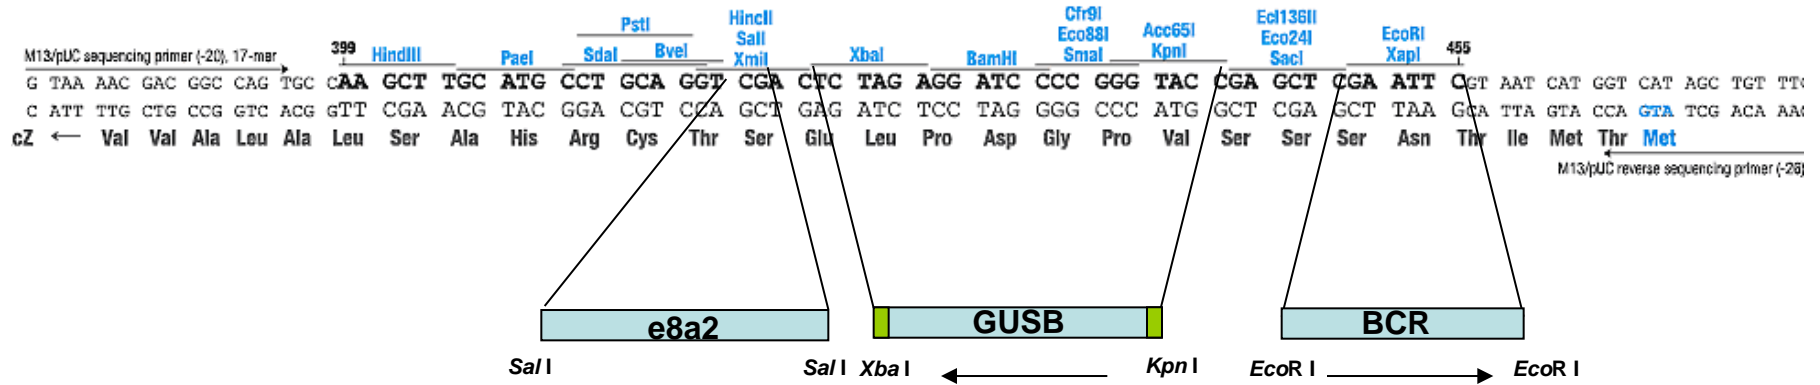

## Cloning site from pCR2.1

E8a2: cloned insert (973bp)

GTCTCCATGACTTGCTGAAGCACACTCCTGCCAGCCACCCTGACCACCCTTGCTGCAGGACGCCCTCCGCATCTCACAGAACCTCCTGTCCAGCATCAATGAGGA  
 GATCACACCCCGACGGCAGTCCATGACGGTGAAGAAGGGAGAG[ GGAGAAGACAGGATGAAAGCTTCATCAACGAGGAAGAGATTACTCCTTATGGAAG ] AAGCCCT  
 TCAGCGGCCAGTAGCATCTGACTTTGAGCCTCAGGGTCTGAGTGAAGCCGCTCGTTGGAACCTCAAGGAAAACCTTCTCGCTGGACCCAGTGAAAATGACCCCAACC  
 TTTTCGTTGCACTGTATGATTTGTGGCCAGTGGAGATAACTCTAAGCATAACTAAAGGTGAAAAGCTCCGGGTCTTAGGCTATAATCACAATGGGGAATGGTGT  
 GAAGCCCAAACCAAAAATGGCCAAGGCTGGGTCCCAAGCAACTACATCACGCCAGTCAACAGTCTGGAGAAAACACTCCTGGTACCATGGGCCTGTGTCCCGCAATGC  
 CGCTGAGTATCTGCTGAGCAGCGGATCAATGGCAGCTTCTTGGTGCGTGAGAGTGAGAGCAGTCTGGCCAGAGGTCCATCTCGCTGAGATACGAAGGGAGGGTGT  
 ACCATTACAGGATCAACTGCTTCTGATGGCAAGCTCTACGTCCTCCTCCGAGAGCCGCTTCAACACCCTGGCCGAGTTGGTTCATCATCATTCAACGGTGGCCGAC  
 GGGTCATACCACGCTCCATTATCCAGCCCCAAGCGCAACAAGCCCACTGTCTATGGTGTGTCCCCCACTACGACAAGTGGGAGATGGAACGCACGGACATCAC  
 CATGAAGCACAAGCTGGCGGGGGCCAGTACGGGGAGGTGTACGAGGGCGTGTGGAAGAAATACAGCCTGACGGTGGCCGTGAAGACCTTGAAGGAGGACACCATGG  
 AGGTGGAAGAG

# Figure S5: pUC18\_BCR\_GUSB\_e19a2

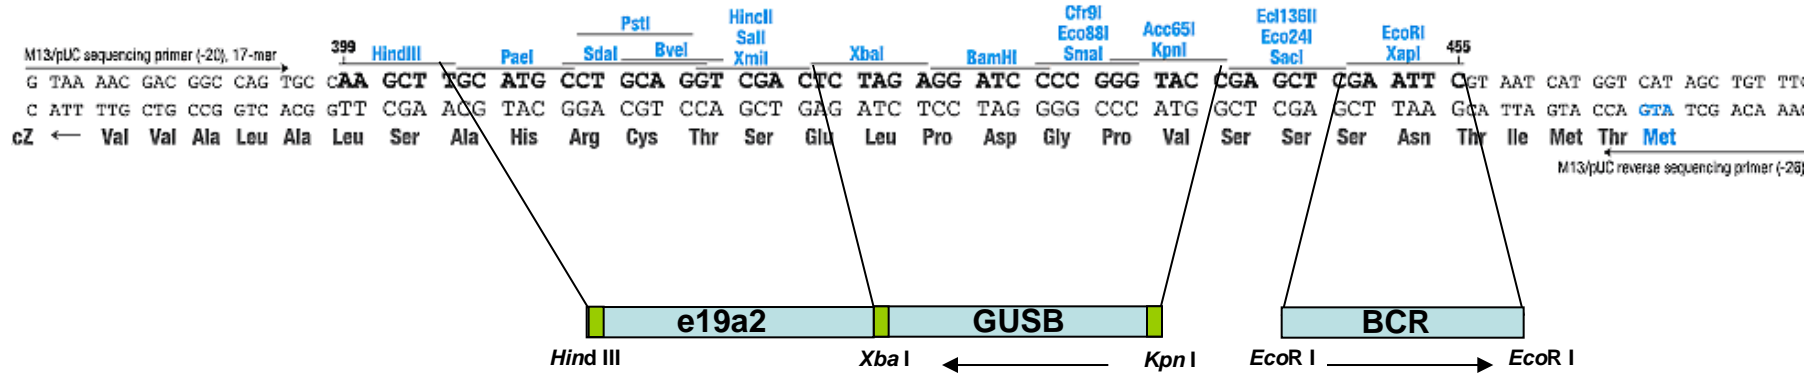

## Cloning site from pCR2.1

E19a2: cloned insert (1646bp)

GGAGGAGGTGGGCATCTACCGCGTGTCCGGTGTGGCCACGGACATCCAGGCCTGAAGGCAGCCCTTCGACGTCAATAACAAGGACGTGTCCGGTGTGATGAGCGAGA  
 TGGACGTGAACGCCATCGCAGGCACGCTGAAGCTGTACTTCCCGTGAGCTGCCCGAGCCCTCTTCACTGACGAGTTCTACCCCAACTTCGCAGAGGGCATCGAAGCC  
 CTTAGCGGCCAGTAGCATCTGACTTTGAGCCTCAGGGTCTGAGTGAAGCCGCTCGTTGGAAGTCCAAGGAAAACCTTCTCGCTGGACCCAGTGAAGTACCCCAA  
 CCTTTTCGTTGCACTGTATGATTTTGTGGCCAGTGGAGATAACACTCTAAGCATAACTAAAGGTGAAAAGCTCCGGGTCTTAGGCTATAATCACAATGGGGAATGGT  
 GTGAAGCCCAACCAAAAATGGCCAAGGCTGGGTCCCAAGCAACTACATCACGCCAGTCAACAGTCTGGAGAAAACACTCCTGGTACCATGGGCCCTGTGTCCCGCAAT  
 GCCGCTGAGTATCTGCTGACGACGCGGGATCAATGGCAGCTTCTTGGTGCCTGAGAGTGAAGCAGTCTGGCCAGAGGTCCATCTCGCTGAGATACGAAGGAGGGT  
 GTACCATTACAGGATCAACACTGCTTCTGATGGCAAGCTCTACGCTCTCCTCCGAGAGCCGCTTCAACACCCCTGGCCGAGTTGGTTTCATCATCATTTCAACGGTGGCCG  
 ACGGCTCATCACACGCTCCATTATCCAGCCCCAAGCGCAACAAGCCCACTGTCTATGGTGTGTCCCAACTACGACAAGTGGGAGATGGAACGCACGGACATC  
 ACCATGAAGCACAAGCTGGGCGGGGGCAGTACGGGGAGGTGTACGAGGGCCTGTGGAAGAAATACAGCCTGACGGTGGCCGTGAAGACCTTGAAGGAGGACACCAT  
 GGAGGTGGAAGAGTTCTTGAAGAAGCTGCAGTCAATGAAAGAGATCAAAACACCTAACCTGGTGCAGCTCCTTGGGGTCTGCACCCGGGAGCCCCGTTCTATATCA  
 TCACCTGAGTTCATGACCTACGGGAACCTCCTGGACTACCTGAGGGAGTGCAACCCGGCAGGAGGTGAACGCCGTGGTGTCTGTGTACATGGCCACTCAGATCTCGTCA  
 GCCATGGAGTACCTGGAGAAGAAAAAATTCATCCACAGAGATCTTGCTGCCGAAATGCCTGGTAGGGGAGAACCCTTGGTGAAGGTAGCTGATTTTGGCCTGAG  
 CAGTTGATGACAGGGGACACCTACACAGCCATGCTGGAGCAAGTTCATCAATGGACTGCACCCGAGAGCTGGCTACAACAAGTTCTCCATCAAGTCCG  
 ACGTCTGGGCATTTGGAGTATTGCTTTGGAAATTGCTACCTATGGCATGTCCCTTACCCGGGAATTGACCTGTCCAGGTGTATGAGCTGCTAGAGAAGGACTAC  
 CGCATGGAGCGCCAGAAAGGCTGCCAGAGAAGGTCTATGAACTCATGCGAGCATGTTGGCAGTGGAAATCCCTCTGACCCGGCCCTCTTTGTGAAATCCACCAAGC  
 CTTTGAACAATGTTCCAGGAATCCAGTATCTCAGACGAAG

# Figure S6: pUC18\_BCR\_GUSB\_ABL1\_e14a3

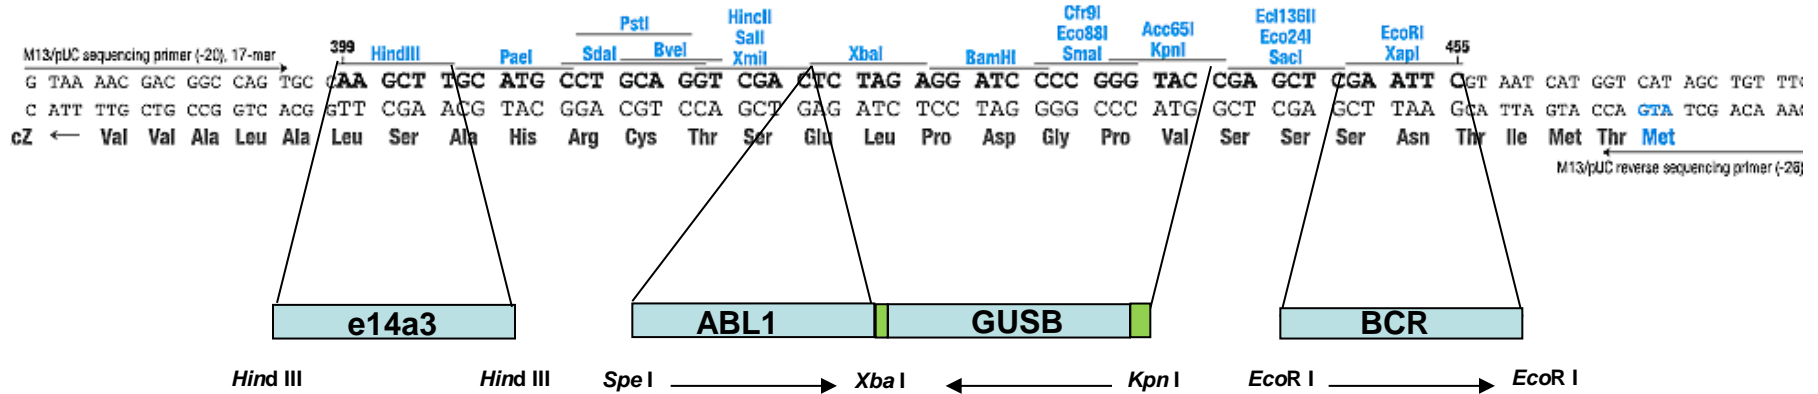

## Cloning site from pCR2.1

E14a3: cloned insert (1433bp)

CTTCTCCCTGACATCCGCTGGAGCTGCAGATGCTGACCAACTCGTGTGTGAACTCCAGACTGTCCACAGCATTCGCTGACCATCAATAAGGAAGATGATGAGTCTC  
 CGGGGCTCTATGGGTTTCTGAATGTTCATCGTCCACTCAGCCACTGGATTTAAGCAGAGTTCAAGTGAAAAGCTCCGGGCTTAGGCTATAATCACAATGGGGAATGG  
 TGTGAAGCCCAAAACAAAATGGCCAAGGCTGGGTCCCAAGCAACTACATCAGCCAGTCAACAGTCTGGAGAAACTCCTTGGTACCATGGGCCTGTGTCCCGCAA  
 TGCCGCTGAGTATCTGCTGAGCAGCGGGATCAATGGCAGCTTCTTGGTGCCTGAGAGTGAGAGCAGTCCCTGGCCAGAGGTCATCTCGCTGAGATACGAAGGGAGGG  
 TGTACCATTACAGGATCAACACTGCTTCTGATGGCAAGCTCTACGTCTCCTCCGAGAGCCGCTTCAACACCCTGGCCGAGTTGGTTCATCATCATTCAACGGTGGCC  
 GACGGGCTCATCACACGCTCCATTATCCAGCCCAAGCGCAACAAGCCCACTGTCTATGGTGTGTCCCAACTACGACAAGTGGGAGATGGAACGCACGGACAT  
 CACCATGAAGCACAAGCTGGGCGGGGGCCAGTACGGGAGGTGTACGAGGGCGTGTGGAAGAAATACAGCCTGACGGTGGCCGTGAAGACCTTGAAGGAGGACACCA  
 TGGAGGTGGAAGAGTTCTTGAAAAGAGCTGCAGTTCATGAAAGAGATCAAACACCCTAACCTGGTGCAGCTCCTTGGGGTCTGCACCCGGGAGCCCGGTTCTATATC  
 ATCACTGAGTTTCATGACCTACGGGAACCTCCTGGACTACCTGAGGGAGTGCAACCGGCAGGAGGTGAACCGCGTGGTGTCTGTACATGGCCACTCAGATCTCGTC  
 AGCCATGGAGTACCTGGAGAAGAAAACTTCAATCCACAGAGATCTTGGTGCAGGAACTGCCTGGTAGGGGAGAACCCTTGGTGAAGGTAGCTGATTTTGGCCCTGA  
 GCAGGTGGATGACAGGGGACACCTACACAGCCATGCTGGAGCCAAAGTTCCCATCAAATGGACTGCACCCGAGAGCCTGGCCCTACAACAAGTTCTCCATCAAGTCC  
 GACGCTGGGCATTTGGAGTATTGCTTTGGGAAATGCTACCTATGGCATGTCCCTTACCCGGGAATTGACCTGTCCCAGGTGTATGAGCTGCTAGAGAAGGACTA  
 CCGCATGGAGCGCCAGAGGCTGCCAGAGAAGGTCTATGAACTCATGCGAGCATGTTGGCAGTGAATCCCTCTGACCCGCCCTCCTTGGTGAATCCACCAAG  
 CTTTGAACAATGTTCCAGGAATCCAGTATCTCAGACGAAG

# Figure S7: pME3

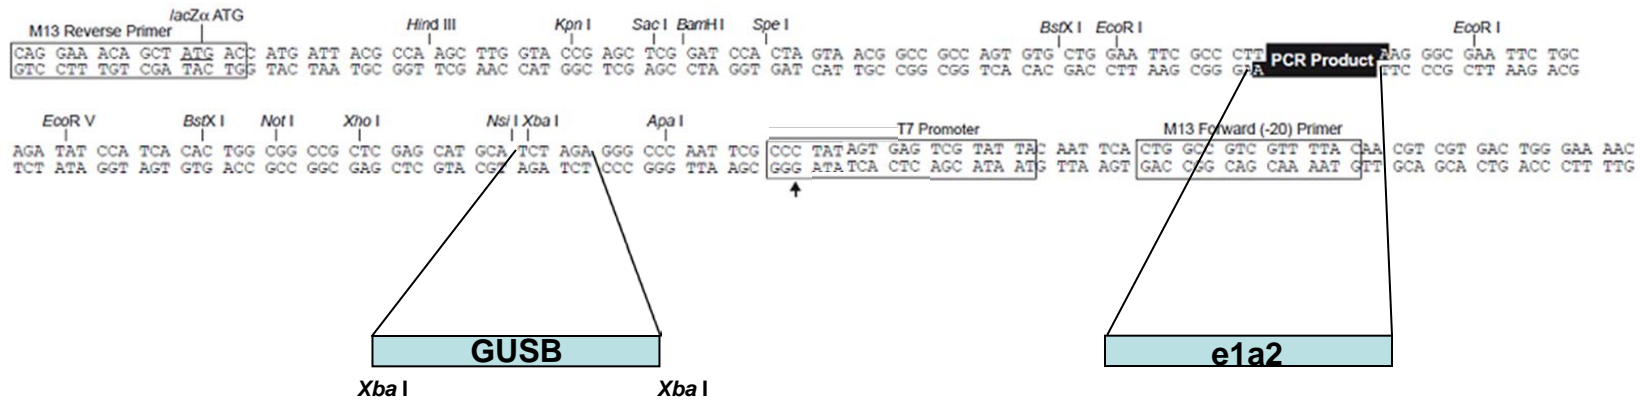

E1a2: cloned insert (870 bp)

```

AGAACCTCACCTCCAGCGAGGAGGACTTCTCCTCTGGCCAGTCCAGCCGCGTGTCCCAAGCCCCACCACCTACCGCATGTTCCGGGACAAAAGCCGCTCTCCCTCG
CAGAACTCGCAACAGTCCCTTCGACAGCAGCAGTCCCCACGCCGAGTGCATTAAGCGGCACCGGCACTGCCCGGTTGTCGTGTCGAGGCCACCATCGTGGGCGT
CCGCAAGACCGGGCAGATCTGGCCCAACGATGGCGAGGGCGCCTTCCATGGAGACGCGAAGCCCTTCAGCGGCCAGTAGCATCTGACTTTGAGCCTCAGGGTCTGA
GTGAAGCCGCTCGTTGGAACCTCAAGGAAAACCTTCTCGCTGGACCCAGTGAATAACCCCAACCTTTTTCGTTGCACTGTATGATTTTGTGGCCAGTGGAGATAAC
ACTCTAAGCATAACTAAAGGTGAAAAGCTCCGGGTCTTAGGCTATAATCACAAATGGGGAATGGTGTGAAGCCCAACCAAAAATGGCCAAGGCTGGGTCCCAAGCAA
CTACATCAGCCAGTCAACAGTCTGGAGAAACACTCCCTGGTACCATGGGCCGTGTGTCCCGCAATGCCGCTGAGTATCTGCTGAGCAGCGGGATCAATGGCAGCTTCT
TGGTGGCTGAGAGTGAGAGCAGTCTGGCCAGAGGTCCATCTCGCTGAGATACGAAGGGAGGGTGTACCATTACAGGATCAACACTGCTTCTGATGGCAAGCTCTAC
GTCTCCTCCGAGAGCCGCTTCAACACCTGGCCGAGTTGGTTTCATCATCATTCACCGGTGGCCGACGGGCTCATCCACGCTCCATTATCCAGCCCCAAGCGCAA
CAAGCCCACTGTCT
  
```

GUSB: cloned insert (501 bp)

```

CAACTCTAGAAACGTTCTGGTCTGCCGTGAACAGTCCAGGAGGCACTTGTCTGCTGCTGTGGAAGTCGCCCTGACTCGGGGAGGAAGGGACACGCAGGTGGTATCA
GCTTGTCTAAGTAAACAGGCTGTTTTCCAACATTTGACTTGGCTACTGAGTGGGATACCTGGTTTCATTGGCAATCTTCAGTATCTCTCGCAAAGGAAC
GCTGCACTTTTTGGTTGCTCTGCCGAGTGAAGATCCCCCTTTTATCCCCAGCACTCTCGTCGGTGAAGTTCAGTCAATGAAATCGGCAAAAATCCAAATGAGCTC
TCCAACCACGATTTTTCTGCGTTTTTGTATCCAGACCCAGATGGTACTGCTCTAGCAGACTTTTTCTGGTACTTTCAGTGAACATCAGAGGTGGATCCTGGTGAAACC
CTGCAATCGTTTTCTGCTCCATACTCGCTCTGAATAATGGGCTTCTGATACTTCTTATACCAGTTCTAGAACCA
  
```



Table S1: Patient characteristic with precise BCR-ABL1 transcript, gender, age at diagnosis and initial tyrosine kinase (TKI) therapy for every patient.

| #   | <b>BCR-ABL1 transcript</b> | <b>Study</b> | <b>Gender</b> | <b>Age at diagnosis (years)</b> | <b>Initial TKI therapy</b> |
|-----|----------------------------|--------------|---------------|---------------------------------|----------------------------|
| #1  | e19a2                      | CML-IV       | m             | 53                              | Imatinib                   |
| #2  | e19a2                      | CML-IV       | m             | 68                              | Imatinib                   |
| #3  | e19a2                      | CML-IV       | m             | 73                              | Imatinib                   |
| #4  | e19a2                      | CML-IV       | m             | 62                              | Imatinib                   |
| #5  | e19a2                      | CML-IV       | m             | 50                              | Imatinib                   |
| #6  | e19a2                      | CML-IV       | m             | 44                              | Imatinib                   |
| #7  | e19a2                      | CML-V        | m             | 71                              | Nilotinib                  |
| #8  | e19a2                      | ENEST 1st    | unknown       | 33                              | Nilotinib                  |
| #9  | e19a2                      | none         | f             | 52                              | Dasatinib                  |
| #10 | e19a2                      | CML-V        | m             | 66                              | Nilotinib                  |
| #11 | e19a2                      | CML-V        | m             | 78                              | Nilotinib                  |
| #12 | e1a2                       | CML-V        | m             | 75                              | Nilotinib                  |
| #13 | e1a2                       | CML-V        | m             | 56                              | Nilotinib                  |
| #14 | e1a2                       | CORNEA       | f             | 71                              | Imatinib                   |
| #15 | e1a2                       | BYOND        | f             | 67                              | Bosutinib                  |
| #16 | e1a2                       | CML-V        | f             | 75                              | Nilotinib                  |
| #17 | e1a2                       | DasaHit      | f             | 64                              | Dasatinib                  |
| #18 | b3a3                       | ENEST 1st    | unknown       | unknown                         | Nilotinib                  |
| #19 | b3a3                       | ENEST 1st    | unknown       | unknown                         | Nilotinib                  |
| #20 | b3a3                       | ENEST 1st    | unknown       | unknown                         | Nilotinib                  |
| #21 | b3a3                       | IRIS         | m             | 48                              | Imatinib                   |
| #22 | b3a3                       | CML-V        | m             | 54                              | Nilotinib                  |
| #23 | b3a3                       | CML-V        | m             | 28                              | Nilotinib                  |
| #24 | b2a3                       | CML-IV       | m             | 62                              | Imatinib                   |
| #25 | b2a3                       | CML-IV       | m             | 65                              | Imatinib                   |
| #26 | b2a3                       | CML-V        | f             | 51                              | Nilotinib                  |
| #27 | b2a3,b3a3                  | CML-IV       | f             | 50                              | Imatinib                   |
| #28 | b2a3,b3a3                  | CML-IV       | m             | 30                              | Imatinib                   |
| #29 | e8a2                       | CML-V        | f             | 60                              | Nilotinib                  |
| #30 | e8a2                       | none         | f             | 72                              | Nilotinib                  |
| #31 | e6a2                       | EUREKA       | m             | 35                              | Nilotinib                  |
| #32 | e8a2                       | none         | f             | 72                              | Nilotinib                  |
| #33 | e6a2                       | EUREKA       | m             | 35                              | Nilotinib                  |

TKI tyrosine kinase
